# Supplementary material for: Effect of Mechanical Damage in Green-Making Process on Aroma of Rougui Tea
Source: MDPI journal article supplement (doi:10.3390/foods13091315), 2024-04-25
Supplement: s1 [file s1]

**Table S2** Real-time PCR gene primersequence

| Gene name        | Gene ID           | Primers (5'-3')           |
|------------------|-------------------|---------------------------|
| <i>CsAFS</i>     | TEA031095.1-qpcrF | CACACCAACCCTAGACGAGTA     |
|                  | TEA031095.1-qpcrR | CGCAGAAGTTCCAAGGTCATT     |
| <i>CsAFS</i>     | TEA009166.1-qpcrF | GAGGAGATAGCCAGGAAGAAGAT   |
|                  | TEA009166.1-qpcrR | GCCACTCTAGCTGTGTTGAC      |
| <i>CsHMGS</i>    | TEA014739.1-qpcrF | GCCAGCGAATAGTAATGTTCTCA   |
|                  | TEA014739.1-qpcrR | ACCTATGCTCCATCACCTTCA     |
| <i>CsLOX</i>     | TEA011765.1-qpcrF | GCGTGACAGAGCCTTACATAA     |
|                  | TEA011765.1-qpcrR | AGAAGCAAGTCTCAATGATTCCA   |
| <i>CsACAA</i>    | TEA015906.1-qpcrF | GCAATTCCAGCAGCAGTGAA      |
|                  | TEA015906.1-qpcrR | GCCGCCATTGACATTGACTT      |
| <i>CsMEP</i>     | TEA027322.1-qpcrF | GGCTGATACTGTCGGTCCTAA     |
|                  | TEA027322.1-qpcrR | CCTTTCGTTGCTCTTTCTTCCA    |
| <i>CsACX</i>     | TEA019216.1-qpcrF | CTCTTCCTTCTTCACAAGCATCAA  |
|                  | TEA019216.1-qpcrR | TTCCATCATAGCAGCCGAGTA     |
| <i>CsISPG</i>    | TEA013763.1-qpcrF | GAGAACTTCCACCAGCAGATG     |
|                  | TEA013763.1-qpcrR | AGCACCAGATGATAATTCCTTGAG  |
| <i>CsPAL</i>     | TEA003374.1-qpcrF | CCGAGCAACACAACCAAGAT      |
|                  | TEA003374.1-qpcrR | CTTCCAAGTGCCTCAAGTCTATG   |
| <i>CsPAT</i>     | TEA033170.1-qpcrF | GGAGCGACGAGATTATTTGGTTA   |
|                  | TEA033170.1-qpcrR | ATAGCGGCATAAGGACTCTGA     |
| <i>CsOPR</i>     | TEA029800.1-qpcrF | GTCTTAGGCTCAAGGCTCAC      |
|                  | TEA029800.1-qpcrR | TGGACTCCTCATCTTCACTACC    |
| <i>CsASP</i>     | TEA024318.1-qpcrF | TTGCTGATGGTGGTGAATGC      |
|                  | TEA024318.1-qpcrR | AAGTGGCTCTCAACTCTGCTA     |
| internal control | <i>CsGAPDH-F</i>  | TTTTTGGCCTTAGGAACCCAGAGG  |
|                  | <i>CsGAPDH-R</i>  | GGGCAGCAGCCTTATCCTTATCAGT |
