# Supplementary material for: Effect of Mechanical Damage in Green-Making Process on Aroma of Rougui Tea
Source: MDPI journal article supplement (doi:10.3390/foods13091315), 2024-04-25
Supplement: s1 [file s1]

**Table S1** q-PCR reaction system

| reagent                                           | capacity    |
|---------------------------------------------------|-------------|
| Template                                          | 2 $\mu$ L   |
| Forward Primer                                    | 0.4 $\mu$ L |
| Reverse Primer                                    | 0.4 $\mu$ L |
| 2×Perfect Start <sup>TM</sup> Green qPCR SuperMix | 10 $\mu$ L  |
| Dye (II)                                          | 0.4 $\mu$ L |
| ddH <sub>2</sub> O                                | 6.8 $\mu$ L |
