# Supplementary material for: Effect of Mechanical Damage in Green-Making Process on Aroma of Rougui Tea
Source: MDPI journal article supplement (doi:10.3390/foods13091315), 2024-04-25
Supplement: s1 [file s1]

**Table S3** The aroma components with different contents of RGT samples

| No. | Compounds                                 | Odour description*          | RI   | Peak area(mean $\pm$ SD)*10 <sup>4</sup> |                       |                       |                       |                       |
|-----|-------------------------------------------|-----------------------------|------|------------------------------------------|-----------------------|-----------------------|-----------------------|-----------------------|
|     |                                           |                             |      | SY                                       | CK7                   | LY7                   | DM                    | ZM                    |
| 1   | nerolidol                                 | Floral, green, citrus, waxy | 1569 | 397.02 $\pm$ 70.79e                      | 8458.35 $\pm$ 511.82b | 9762.44 $\pm$ 124.96a | 3385.72 $\pm$ 275.43d | 6099.16 $\pm$ 214.06c |
| 2   | Linalool                                  | Floral, fruity              | 1101 | 2604.70 $\pm$ 143.52b                    | 3303.35 $\pm$ 87.61a  | 1972.66 $\pm$ 13.12c  | 415.02 $\pm$ 37.68e   | 613.02 $\pm$ 48.10d   |
| 3   | Linalool oxide I                          | Sweet, floral,creamy        | 1071 | 430.50 $\pm$ 61.80d                      | 2780.93 $\pm$ 218.43a | 2313.99 $\pm$ 145.02b | 579.45 $\pm$ 82.95d   | 758.58 $\pm$ 57.34c   |
| 4   | Linalool oxide III                        | Sweet woody                 | 1170 | 69.24 $\pm$ 5.56c                        | 582.78 $\pm$ 16.39a   | 590.69 $\pm$ 40.63a   | 268.85 $\pm$ 35.59b   | 281.35 $\pm$ 21.81b   |
| 5   | 3,7-dimethyl-1,5,7-Octatrien-3-ol         | Tropical                    | 1105 | 213.80 $\pm$ 43.83d                      | 734.35 $\pm$ 38.71b   | 549.60 $\pm$ 24.17c   | 920.22 $\pm$ 105.34a  | 787.98 $\pm$ 62.34b   |
| 6   | Phenylethyl Alcohol                       | Floral, rose-like           | 1111 | 155.45 $\pm$ 13.28e                      | 517.80 $\pm$ 54.34c   | 862.73 $\pm$ 39.95a   | 307.02 $\pm$ 32.66d   | 613.74 $\pm$ 47.50b   |
| 7   | Benzyl alcohol                            | Floral, rose-like           | 1033 | 104.13 $\pm$ 5.22d                       | 182.96 $\pm$ 6.81c    | 538.79 $\pm$ 15.90a   | 146.50 $\pm$ 29.61c   | 406.56 $\pm$ 31.22b   |
| 8   | 1-Hexanol                                 | Yeast aroma, Green          | 867  | 60.81 $\pm$ 9.91c                        | 313.86 $\pm$ 9.20b    | 806.78 $\pm$ 101.79a  | 7.75 $\pm$ 1.53d      | 57.02 $\pm$ 4.66c     |
| 9   | $\alpha$ -Farnesene                       | Floral                      | 1508 | 265.71 $\pm$ 30.25c                      | 4364.54 $\pm$ 197.12a | 2993.17 $\pm$ 35.56b  | 14.70 $\pm$ 5.33d     | 21.90 $\pm$ 1.41d     |
| 10  | (E)- $\beta$ -Farnesene                   | woody                       | 1454 | 33.56 $\pm$ 5.28e                        | 385.83 $\pm$ 36.80b   | 438.92 $\pm$ 20.65a   | 167.93 $\pm$ 9.72d    | 303.35 $\pm$ 7.04c    |
| 11  | (Z)-2-Penten-1-ol                         | Fruity                      | 760  | 20.95 $\pm$ 3.91e                        | 34.60 $\pm$ 1.61d     | 47.60 $\pm$ 4.60c     | 102.72 $\pm$ 16.79b   | 161.27 $\pm$ 9.55a    |
| 12  | (E)-2-Hexen-1-ol                          | Herbaceous, green           | 863  | 37.09 $\pm$ 7.81c                        | 285.56 $\pm$ 6.73b    | 504.92 $\pm$ 84.79a   | 6.34 $\pm$ 0.94d      | 40.51 $\pm$ 3.02c     |
| 13  | (E)-3-Hexen-1-ol                          | Green, moss, fresh          | 852  | 1323.08 $\pm$ 143.98a                    | 1475.27 $\pm$ 59.02a  | 1391.53 $\pm$ 119.09a | 37.21 $\pm$ 6.43c     | 149.34 $\pm$ 11.44b   |
| 14  | 5-methyl-2-(1-methylethenyl)-4-Hexen-1-ol | Floral                      | 1253 | 361.34 $\pm$ 4.60e                       | 709.05 $\pm$ 29.35d   | 4013.62 $\pm$ 173.37a | 988.03 $\pm$ 102.46c  | 2328.32 $\pm$ 121.76b |

|    |                                                   |                               |      |               |                 |                 |                 |                 |
|----|---------------------------------------------------|-------------------------------|------|---------------|-----------------|-----------------|-----------------|-----------------|
| 15 | Indole                                            | Floral, animal-like           | 1291 | 235.37±33.44e | 4989.99±176.95b | 5341.94±152.03a | 1225.25±99.60d  | 1803.48±91.38c  |
| 16 | Phenylacetonitrile                                | Aromatic                      | 1135 | 34.81±5.94d   | 1166.52±150.63a | 843.38±22.08b   | 228.96±20.11c   | 286.86±19.29c   |
| 17 | Benzaldehyde                                      | Honey, floral                 | 958  | 13.87±3.86d   | 38.42±3.29c     | 66.59±1.57b     | 43.03±5.35c     | 122.83±8.42a    |
| 18 | Phenylacetaldehyde                                | Honey-like, sweet             | 1041 | 3.57±1.20d    | 90.60±16.29b    | 129.30±5.51a    | 47.87±5.67c     | 115.68±7.51a    |
| 19 | Citral                                            | Lemony                        | 1268 | 5.46±1.50d    | 7.78±1.23d      | 52.12±3.30a     | 16.49±2.75c     | 31.63±2.70b     |
| 20 | β-Cyclocitral                                     | Sweet, herbal, hay-like       | 1217 | 20.76±3.35c   | 7.47±0.89d      | 16.12±0.99c     | 54.30±6.36b     | 79.83±6.10a     |
| 21 | (E)- 2-Hexenal                                    | Grassy green                  | 850  | 0.00          | 0.00            | 24.49±7.40a     | 4.01±0.47c      | 14.95±1.56b     |
| 22 | Jasmone                                           | Herbal, floral, spicy, celery | 1392 | 118.48±11.36e | 853.59±43.58b   | 1104.85±4.77a   | 329.80±37.30d   | 486.74±22.69c   |
| 23 | (E)-α-Ionone                                      | Floral, woody, violet-like    | 1426 | 19.36±1.84d   | 17.86±0.67d     | 40.95±0.50c     | 173.16±24.82b   | 363.95±26.48a   |
| 24 | β-Ionone epoxide                                  | Fruity                        | 1480 | 5.72±0.54c    | 5.38±0.19c      | 12.21±0.42c     | 111.20±19.26b   | 273.35±18.24a   |
| 25 | Jasmine lactone                                   | Jasmine-like, floral Sweet    | 1489 | 217.44±27.09e | 5099.79±334.12b | 7129.95±144.25a | 1829.08±222.08d | 3382.43±101.51c |
| 26 | Methyl salicylate                                 | Fresh, faint gingery, grass   | 1190 | 796.31±56.92c | 1127.21±103.86b | 1374.89±16.27a  | 174.98±26.81e   | 381.65±30.76d   |
| 27 | 2,6-Octadienoic acid, 3,7-dimethyl-, methyl ester | Flowery and honey aroma       | 1321 | 20.45±3.55c   | 16.05±0.33d     | 43.09±1.41a     | 10.77±1.91e     | 30.12±2.47b     |
| 28 | 1-Hexyl acetate                                   | Fruity                        | 1013 | 105.19±13.09c | 388.76±23.35b   | 1150.63±61.86a  | 6.94±0.41d      | 106.90±9.51c    |
| 29 | Hexyl hexanoate                                   | Fruity odour                  | 1381 | 95.38±4.53e   | 239.02±38.83c   | 882.52±48.82a   | 182.27±15.54d   | 452.33±35.75b   |
| 30 | (E)-3-Hexenyl butyrate                            | Fruity odour                  | 1212 | 930.12±59.05c | 1602.06±113.45b | 2365.09±59.18a  | 92.26±9.69e     | 256.30±20.93d   |
| 31 | Acetic acid, phenylmethyl ester                   | Honey                         | 1161 | 8.87±0.97c    | 8.39±0.28c      | 22.76±0.39a     | 6.79±0.25c      | 14.57±0.58b     |
| 32 | Nonanoic acid, methyl ester                       | Fruity                        | 1925 | 4.15±0.66d    | 7.40±0.32d      | 185.00±8.43a    | 25.40±5.19c     | 150.61±1.48b    |

|    |                                                     |                           |      |                |                 |                 |                 |                 |
|----|-----------------------------------------------------|---------------------------|------|----------------|-----------------|-----------------|-----------------|-----------------|
| 33 | (Z,Z,Z)-9,12,15-Octadecatrienoic acid, methyl ester | Fatty                     | 2095 | 0.87 ± 0.01c   | 3.22 ± 0.51c    | 87.62 ± 7.08a   | 3.81 ± 0.49c    | 24.86 ± 0.52b   |
| 34 | Acetic acid, 2-phenylethyl ester                    | Floral                    | 1253 | 17.31 ± 3.48d  | 93.79 ± 1.28b   | 215.74 ± 3.25a  | 20.56 ± 2.48d   | 64.46 ± 3.73c   |
| 35 | Butanoic acid, 2-methyl-, hexyl ester               | Green                     | 1237 | 13.99 ± 3.48c  | 24.91 ± 1.09b   | 34.10 ± 0.96a   | 4.97 ± 0.46d    | 14.42 ± 1.39c   |
| 36 | 5-ethyldihydro-2(3H)-Furanone                       | Fragrance of coconut      | 1049 | 26.71 ± 1.20d  | 90.99 ± 3.13c   | 137.99 ± 1.95b  | 135.57 ± 16.65b | 222.48 ± 12.53a |
| 37 | trans-2-Hexenyl Butyrate                            | Green,fruity              | 1196 | 44.12 ± 3.16c  | 170.31 ± 0.46b  | 453.78 ± 7.70a  | 9.09 ± 1.26d    | 38.40 ± 3.13c   |
| 38 | Butanoic acid, hexyl ester                          | Fruity                    | 1193 | 17.48 ± 1.29 c | 54.39 ± 4.24b   | 186.41 ± 12.25a | 7.48 ± 0.82d    | 27.81 ± 2.21c   |
| 39 | Limonene                                            | Lemon-like                | 1034 | 8.79 ± 1.87d   | 4.10 ± 0.45d    | 20.05 ± 5.05c   | 45.33 ± 3.88a   | 35.66 ± 2.84b   |
| 40 | β-Ocimene                                           | Citrus, herbaceous, sweet | 1047 | 8.51 ± 1.35d   | 439.26 ± 25.73a | 82.18 ± 6.37b   | 28.94 ± 2.06c   | 17.46 ± 1.65c   |
| 41 | 2-pentyl-Furan                                      | Fruity                    | 989  | 10.47 ± 1.59c  | 8.04 ± 0.48c    | 19.22 ± 1.43c   | 106.41 ± 8.18b  | 217.15 ± 18.14a |
| 42 | Coumarin                                            | Tonka                     | 1430 | 23.46 ± 2.54b  | 26.56 ± 2.59b   | 39.17 ± 4.97a   | 26.42 ± 4.65b   | 30.12 ± 1.62b   |

\*Odour descriptions were from the database (Flavornet; Perflavory) and the literatures (Flaig et al., 2020; Guo et al., 2021; Joshi & Gulati, 2015; Liao et al., 2020; Magagna et al., 2017; Sheibani et al., 2016)
