# Supplementary material for: Effect of Mechanical Damage in Green-Making Process on Aroma of Rougui Tea
Source: Foods. 2024 Apr 25;13(9):1315. doi: 10.3390/foods13091315 (PMC11083345; doi:10.3390/foods13091315)
Supplement: Supplementary file 1 [file foods-13-01315-s001.zip]

Archive with 4 entries (4 files):
- Figure.S1.pdf
- Table S1.pdf
- Table S2 Real.pdf
- Table S3.pdf
