# Supplementary figures and images for: Effect of Mechanical Damage in Green-Making Process on Aroma of Rougui Tea
Source: MDPI journal article supplement (doi:10.3390/foods13091315), 2024-04-25

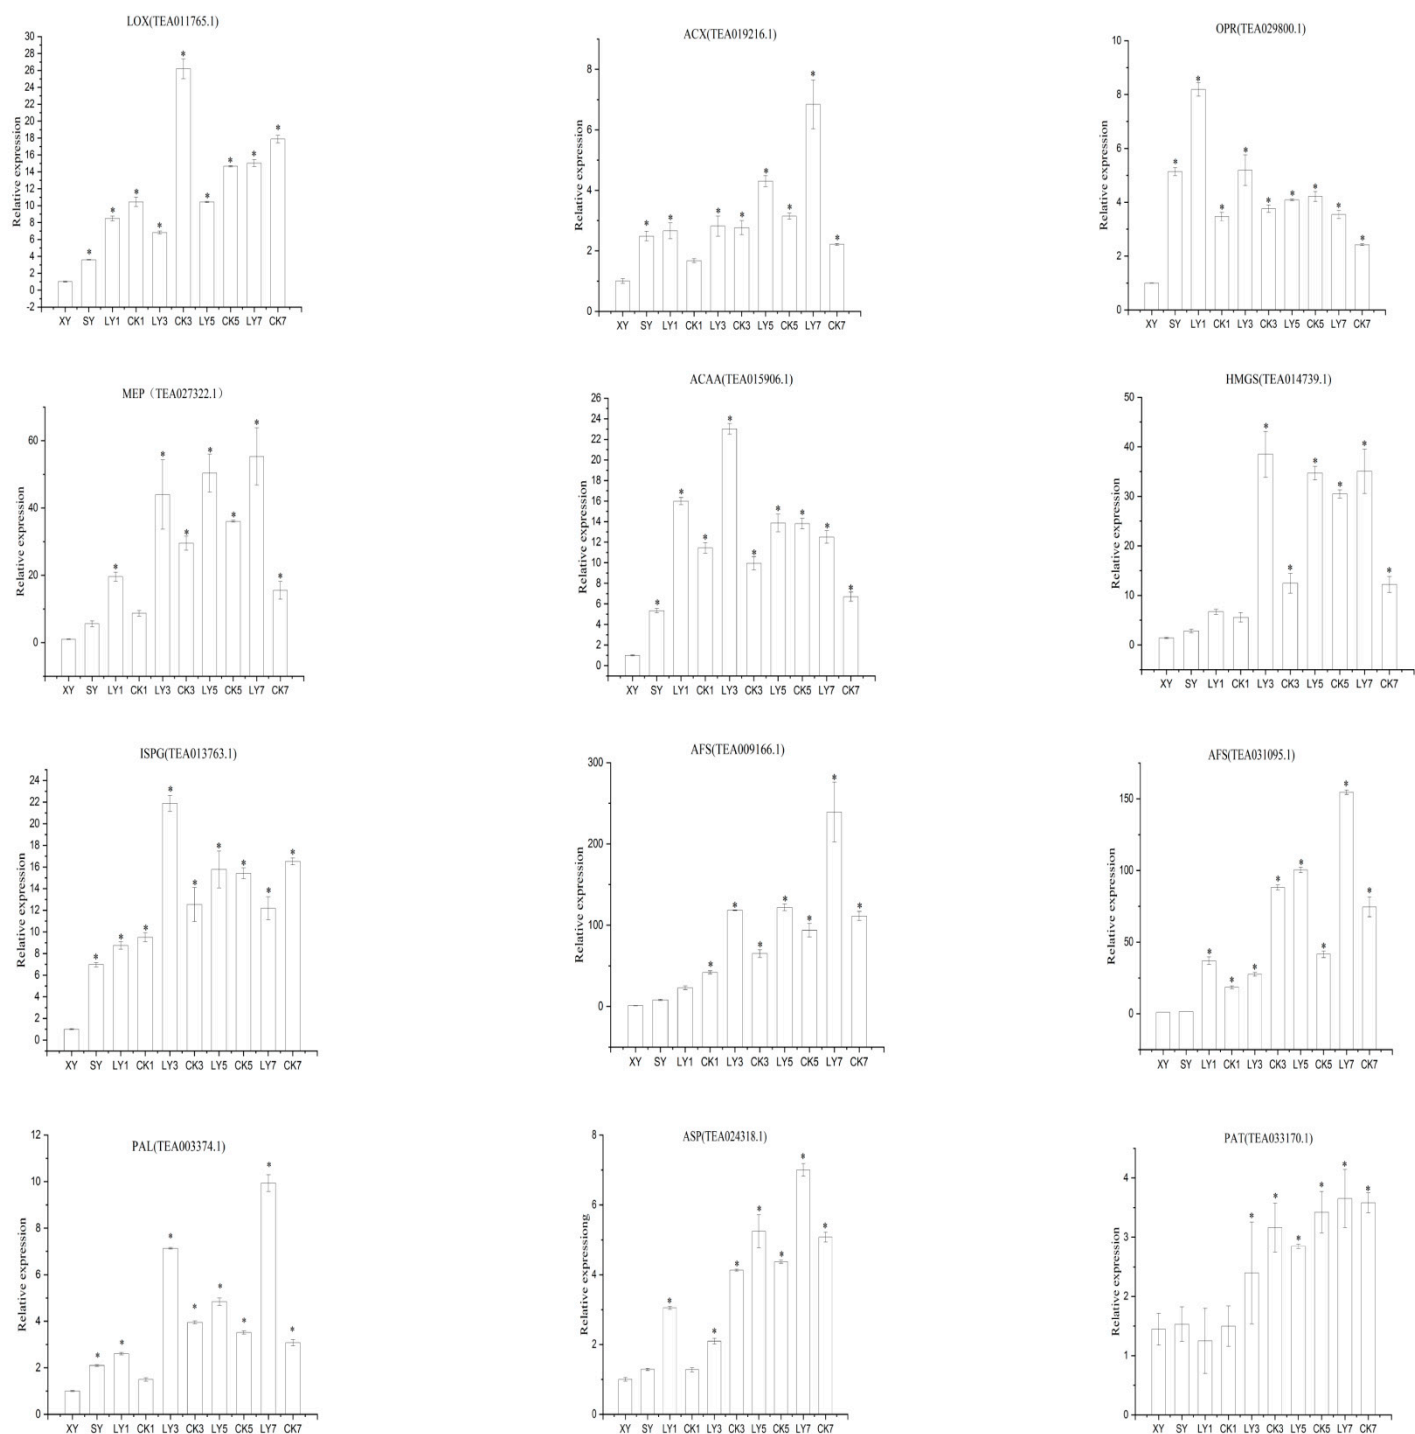

**Figure S1.** The expression level of related genes in different samples based on RT-PCR analysis.

Supplement: s1 [file s1]
